# Supplementary material
Source: Research Square preprint supplement (doi:10.21203/rs.3.rs-10107987/v1)
Supplement: Supplementary file 1 [file ec353134cabd2e6e5cfd942a.docx]

**Appendices: Research Instruments and Coding Protocol**

# Appendix A. Coding Protocol for Classroom Observation

This protocol operationalizes the distinction between code-switching as bounded repair and translanguaging as repertoire-based access in Arabic-as-a-foreign-language classroom observation data. Coders should assign the code that captures the dominant pedagogical function of each classroom episode. When an episode includes overlapping features, the inclusion and exclusion criteria below should be used to determine the primary code, with any secondary feature recorded in the analytic memo.

*Coding unit:* A discrete instructional or interactional episode, typically a teacher turn, a learner turn, or a short sequence of classroom interaction organized around the same pedagogical purpose.

| **Code** | **Definition** | **Inclusion Criteria** | **Exclusion Criteria** |
| --- | --- | --- | --- |
| CS-VOC | Brief support-language shift for vocabulary. | The teacher provides a short equivalent, synonym, translation, or gloss in a familiar support language and then returns to Arabic. | Extended cross-language comparison or contrastive explanation; code as TL-COMP. |
| CS-GRAM | Brief support-language shift for grammar. | The teacher gives a concise grammar explanation in a support language to resolve immediate confusion. | Use of diagrams, contrastive patterns, or multiple semiotic resources across languages; code as TL-MULTI. |
| CS-INSTR | Brief shift for task or classroom instruction. | The teacher clarifies task instructions, procedural expectations, or classroom management in a support language. | A broader activity deliberately designed around multiple languages or multilingual interaction. |
| TL-COMP | Cross-language comparison. | The teacher or students compare Arabic with another language to explain morphology, syntax, vocabulary, meaning, pragmatics, or usage. | A single translation or brief gloss without comparison; code as CS-VOC. |
| TL-PEER | Multilingual peer negotiation. | Students use Arabic and one or more additional languages to solve a comprehension problem, negotiate meaning, or prepare Arabic output. | Private off-task talk unrelated to the lesson or language-learning task. |
| TL-MULTI | Integrated multimodal ensemble. | Linguistic resources are coordinated with gesture, boardwork, diagrams, images, written contrast, pronunciation modeling, or other semiotic resources. | Gesture or visuals accompanying Arabic-only explanation without multilingual comparison or repertoire-based support. |
| NEG-OVER | Negative case: over-reliance or overload. | Students become confused by too many languages, avoid Arabic output, or allow the support language to dominate the learning task. | Purposeful support that returns students to Arabic comprehension, practice, or production. |

*Note:* If an episode contains both code-switching and translanguaging, coders should classify the primary function and record the secondary feature in a memo. For example, a single English gloss followed by Arabic practice is coded as CS-VOC, whereas an English gloss followed by cross-language comparison, boardwork, and learner-generated examples is coded as TL-MULTI or TL-COMP depending on the dominant function.

# Appendix B. Student Questionnaire: Perceptions of Multilingual Pedagogy

This questionnaire measures learners’ perceptions of code-switching, translanguaging, motivation, attitudes, participation, and perceived pedagogical effectiveness in AFL classrooms. Items are scored on a five-point Likert scale: 1 = Strongly disagree, 2 = Disagree, 3 = Neutral, 4 = Agree, and 5 = Strongly agree.

| **Subscale** | **Item No.** | **Questionnaire Item** |
| --- | --- | --- |
| Perceived Code-Switching: Bounded Support | 1 | My teacher uses a support language (e.g., English or Urdu) to quickly translate difficult Arabic words. |
| Perceived Code-Switching: Bounded Support | 2 | Brief explanations in a support language help me understand complex Arabic grammar rules. |
| Perceived Code-Switching: Bounded Support | 3 | Using a support language for instructions saves time in the classroom. |
| Perceived Translanguaging: Repertoire-Based Support | 4 | My teacher encourages me to compare Arabic grammar with the grammar of my first language. |
| Perceived Translanguaging: Repertoire-Based Support | 5 | I feel comfortable using all the languages I know to help me understand a new Arabic concept. |
| Perceived Translanguaging: Repertoire-Based Support | 6 | My teacher uses drawings, gestures, and multiple languages together to make the lesson clear. |
| Perceived Translanguaging: Repertoire-Based Support | 7 | I am allowed to discuss difficult Arabic texts with my classmates using our shared languages. |
| Motivation and Attitudes | 8 | Using my full linguistic repertoire makes me more excited to learn Arabic. |
| Motivation and Attitudes | 9 | I feel like a successful learner when I can use my other languages to help me master Arabic. |
| Motivation and Attitudes | 10 | I have a more positive attitude toward Arabic when my own language is respected in class. |
| Participation and Pedagogical Effectiveness | 11 | I participate more in class discussions when I can use a support language to bridge my ideas. |
| Participation and Pedagogical Effectiveness | 12 | Multilingual support helps me feel less anxious when speaking Arabic. |
| Participation and Pedagogical Effectiveness | 13 | The use of multiple languages and visuals helps me remember Arabic vocabulary longer. |

*Scoring note:* Higher scores indicate stronger perceived support for multilingual pedagogy and stronger learner affect, participation, or perceived effectiveness. Negatively worded items may be added in future administrations to reduce acquiescence bias.

# Appendix C. Semi-Structured Interview Protocol for Students

The student interview protocol elicits learners’ experiences of Arabic-only instruction, bounded code-switching, translanguaging, peer interaction, and affective positioning as international learners of Arabic. Interviewers may ask follow-up questions when clarification or concrete classroom examples are needed.

| **Domain** | **Guiding Question** |
| --- | --- |
| Introductory background | How long have you studied Arabic, and what languages do you speak at home or in daily life? |
| Arabic-only experience | How do you feel when the teacher uses only Arabic in the classroom? Can you describe a time when you felt stuck? |
| Code-switching | Do you find it helpful when the teacher gives a quick translation or short explanation in English, Urdu, or another support language? Why or why not? |
| Translanguaging | Do you ever compare Arabic words, grammar, or expressions with your own language to help you remember them? Can you give an example? |
| Peer interaction | Does being allowed to talk to classmates in a shared language help you participate more in the final Arabic activity? |
| Affective positioning | Does the use of other languages make you feel more or less legitimate as an Arabic learner? Please explain. |

# Appendix D. Semi-Structured Interview Protocol for Teachers

The teacher interview protocol explores institutional expectations, professional decision-making, teacher agency, multimodal support, and perceived risks in the use of multilingual pedagogy in AFL classrooms.

| **Domain** | **Guiding Question** |
| --- | --- |
| Institutional context | What are the official policies or expectations regarding language use in your AFL classroom? |
| Decision-making | When you notice that students are not understanding the lesson, what is your first strategy for addressing the problem? |
| Agency | How do you balance the expectation of Arabic-only instruction with the practical need to help students understand? |
| Differentiation | How do you distinguish between simply translating a word (code-switching) and creating a multilingual meaning-making space (translanguaging)? |
| Multimodality | How do you use the whiteboard, gestures, images, pronunciation modeling, or examples in combination with different languages to support AFL learning? |
| Challenges | What are the risks of using too much of a support language, and how do you ensure that students return to Arabic output? |

# Appendix E. Sample Student Placement Test Structure

The following table describes the structure of the 100-item institutional placement instrument used to determine participant proficiency level. The test assessed vocabulary, grammar and morphology, and reading comprehension in Modern Standard Arabic.

| **Section** | **Number of Items** | **Content Assessed** |
| --- | --- | --- |
| Vocabulary | 30 items | Multiple-choice items assessing synonyms, antonyms, and context-appropriate word usage in Modern Standard Arabic. |
| Grammar and Morphology | 40 items | Multiple-choice items assessing verb roots, patterns (awzan), case markings (iʿrab), sentence structures, and grammatical accuracy. |
| Reading Comprehension | 30 items | Short passages followed by literal and inferential comprehension questions. |

## Result Mapping

| **Score Range** | **CEFR Level** | **Descriptor** |
| --- | --- | --- |
| 0-35 | A1 | Beginner |
| 36-60 | A2 | Elementary |
| 61-80 | B1 | Intermediate |
| 81-100 | B2 | Upper-Intermediate |
